# Supplementary material for: SiO2nanoparticles cause depression and anxiety-like behavior in adult zebrafish
Source: Royal Society of Chemistry journal article supplement (doi:10.1039/c6ra24215d), 2016-12-08
Supplement: c6ra24215d1.pdf [file c6ra24215d1.pdf]

## Supplementary materials

### **SiO<sub>2</sub> nanoparticles cause depression and anxiety-like behavior in adult zebrafish**

Contents

Supplementary Figures

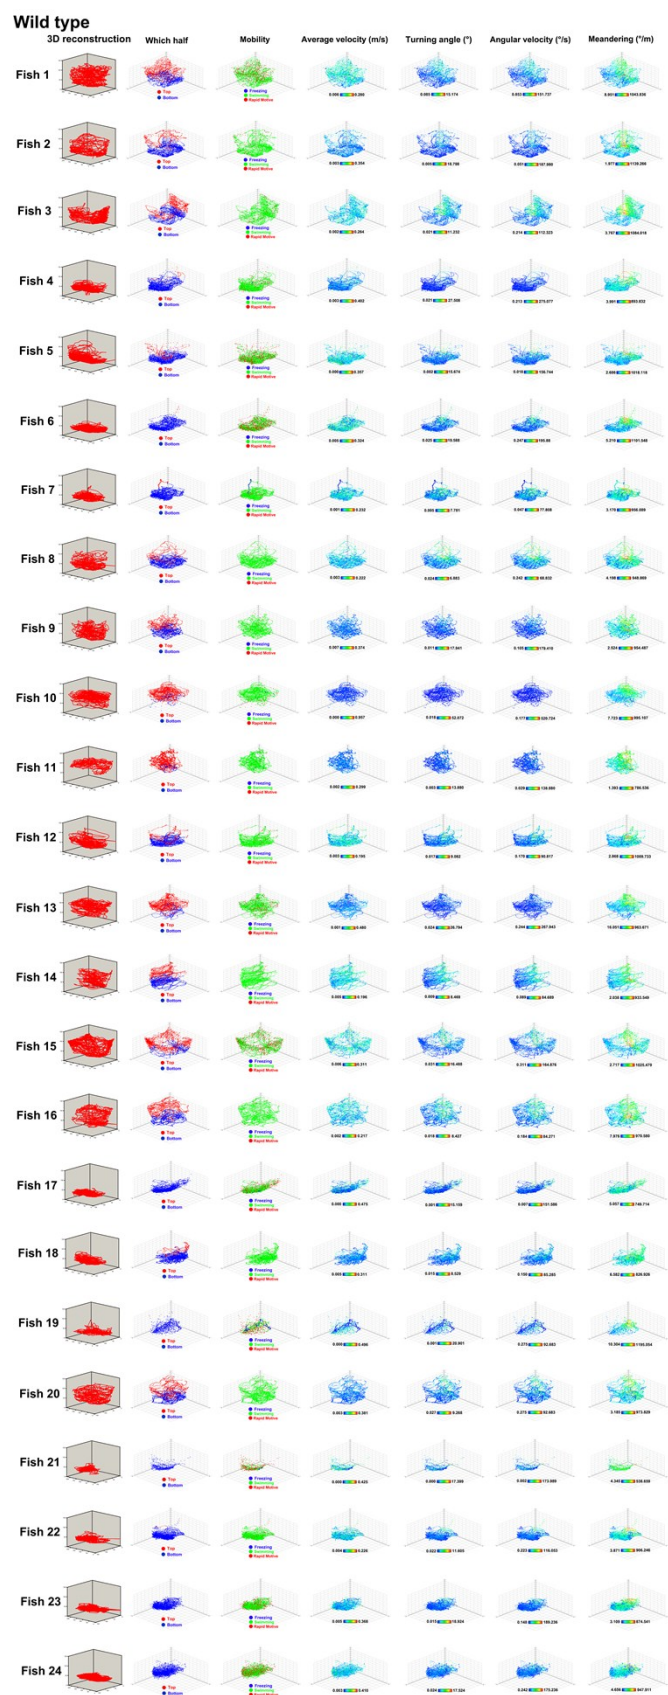

**Figure S1** 3D reconstruction and 3D spatiotemporal reconstruction of swimming path of wild

type zebrafish

### Silica 100 $\mu\text{g}/\text{mL}$

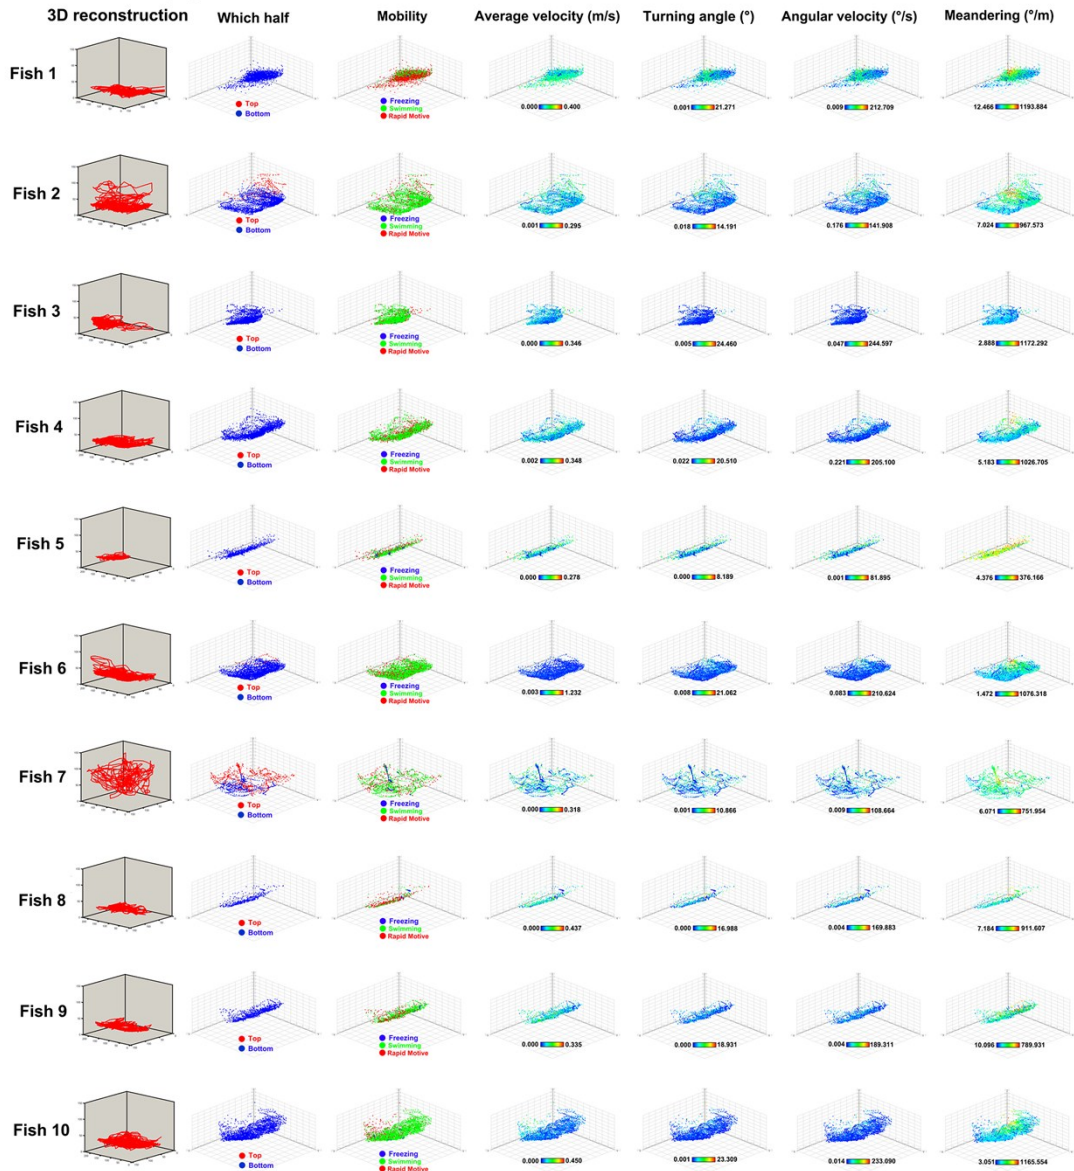

**Figure S2** 3D reconstruction and 3D spatiotemporal reconstruction of swimming path of zebrafish exposed to 100  $\mu\text{g}/\text{mL}$  nao-silica

## Silica 1000 $\mu\text{g/mL}$

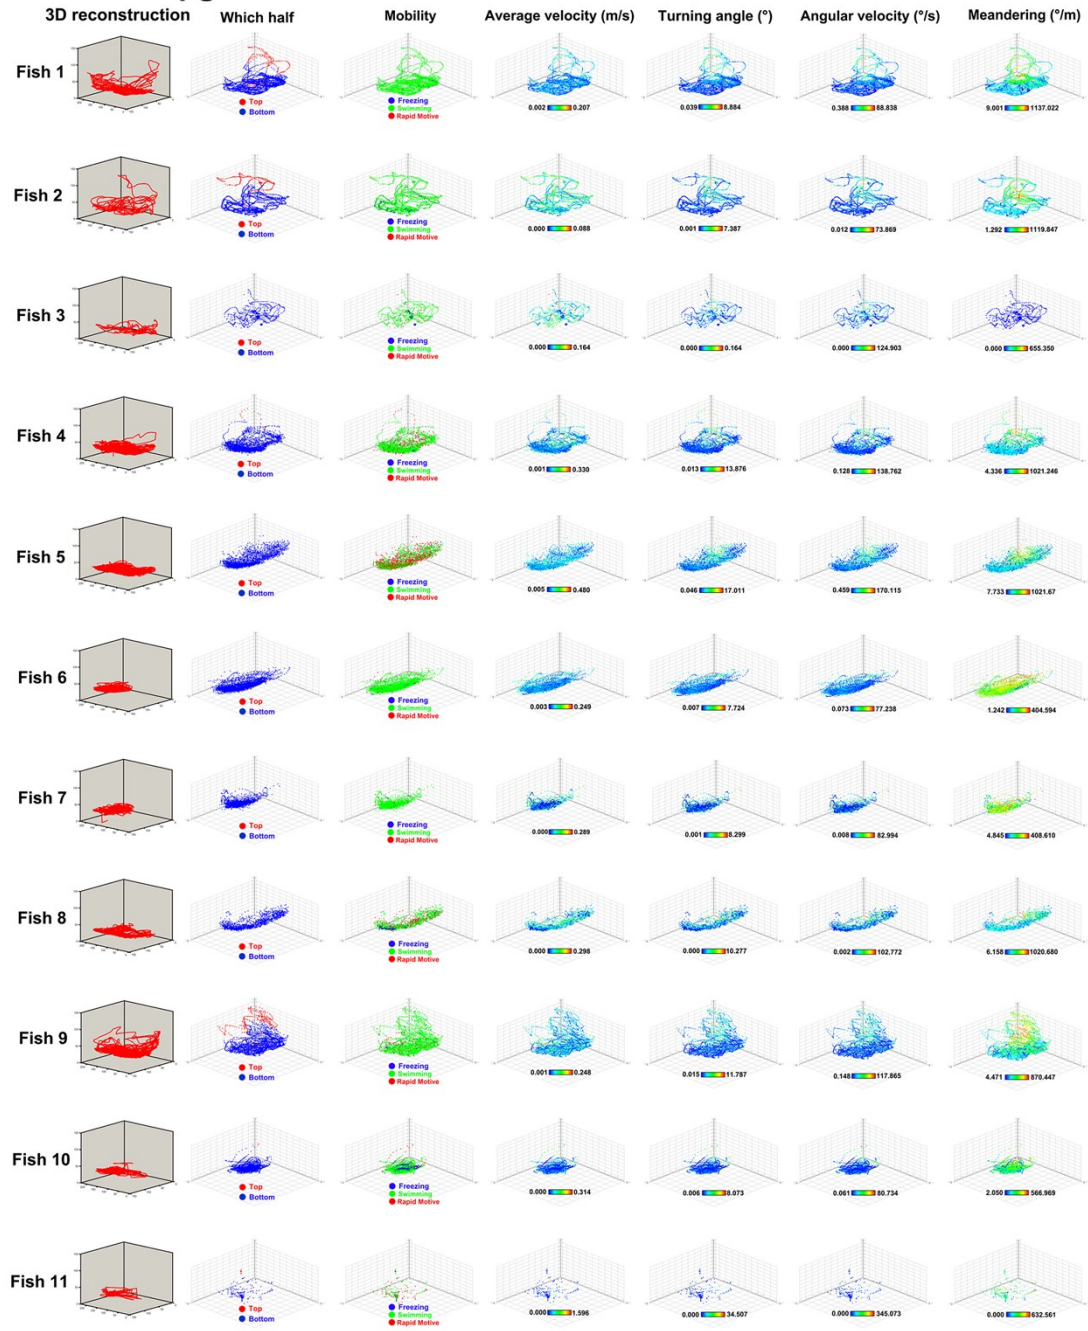

**Figure S3** 3D reconstruction and 3D spatiotemporal reconstruction of swimming path of zebrafish exposed to 1000  $\mu\text{g/mL}$  nao-silica

## Reserpine 1 $\mu\text{g/mL}$

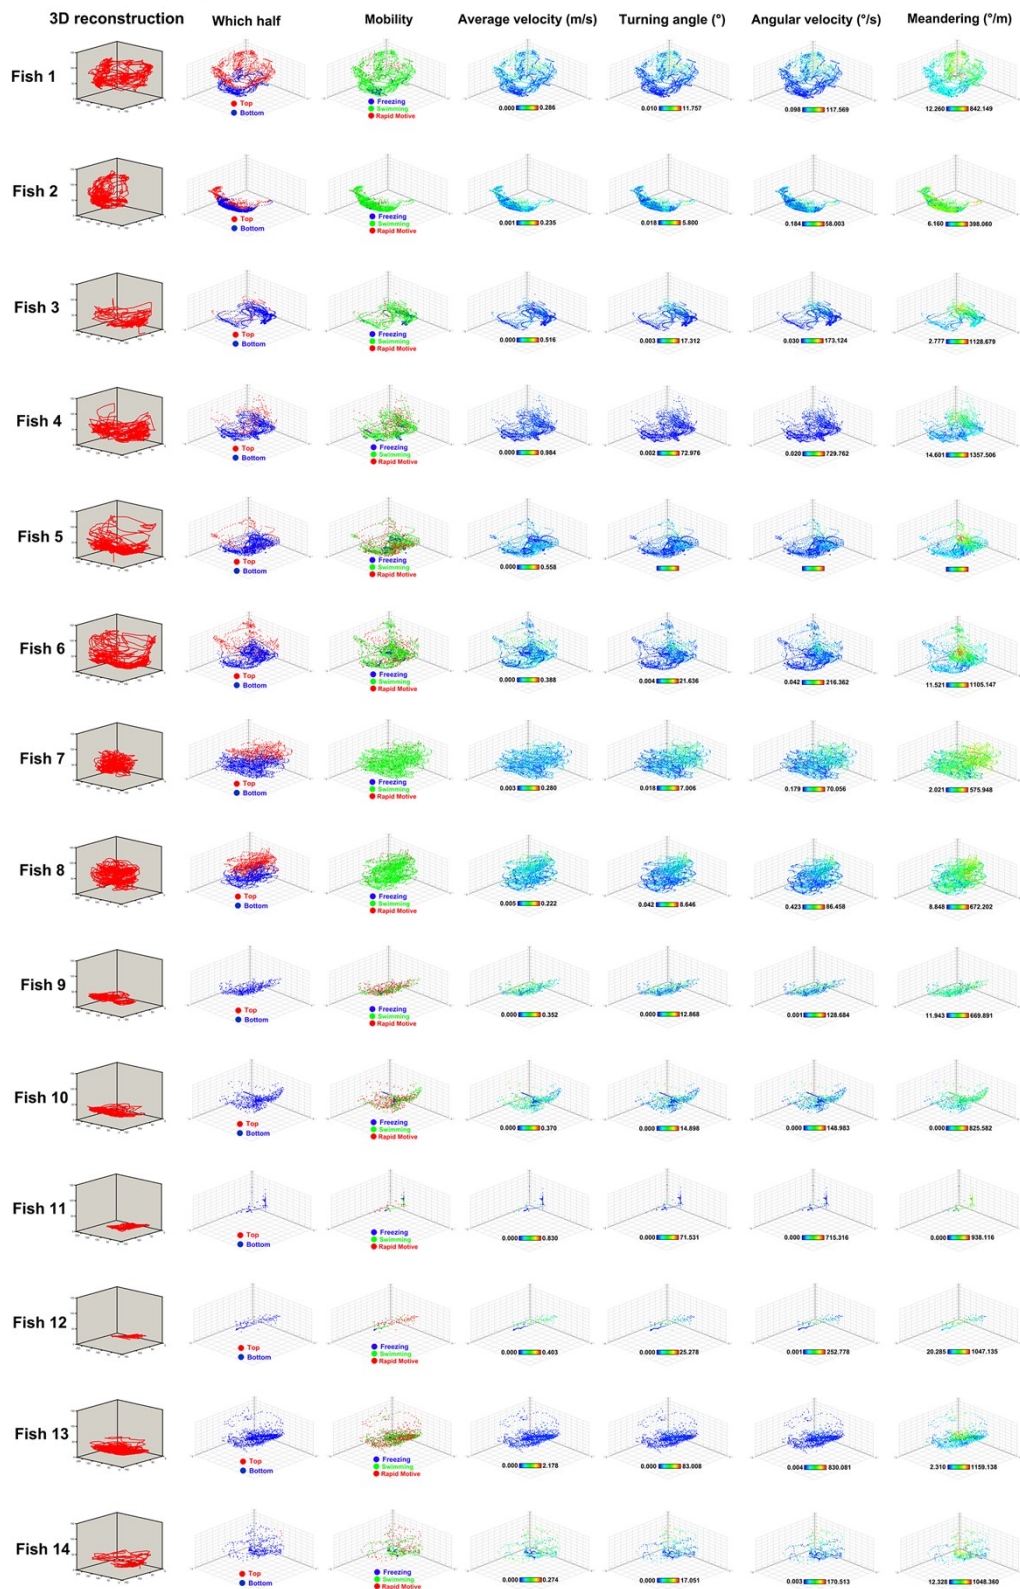

**Figure S4** 3D reconstruction and 3D spatiotemporal reconstruction of swimming path of zebrafish exposed to 1  $\mu\text{g/mL}$  reserpine

## Reserpine 10 $\mu\text{g/mL}$

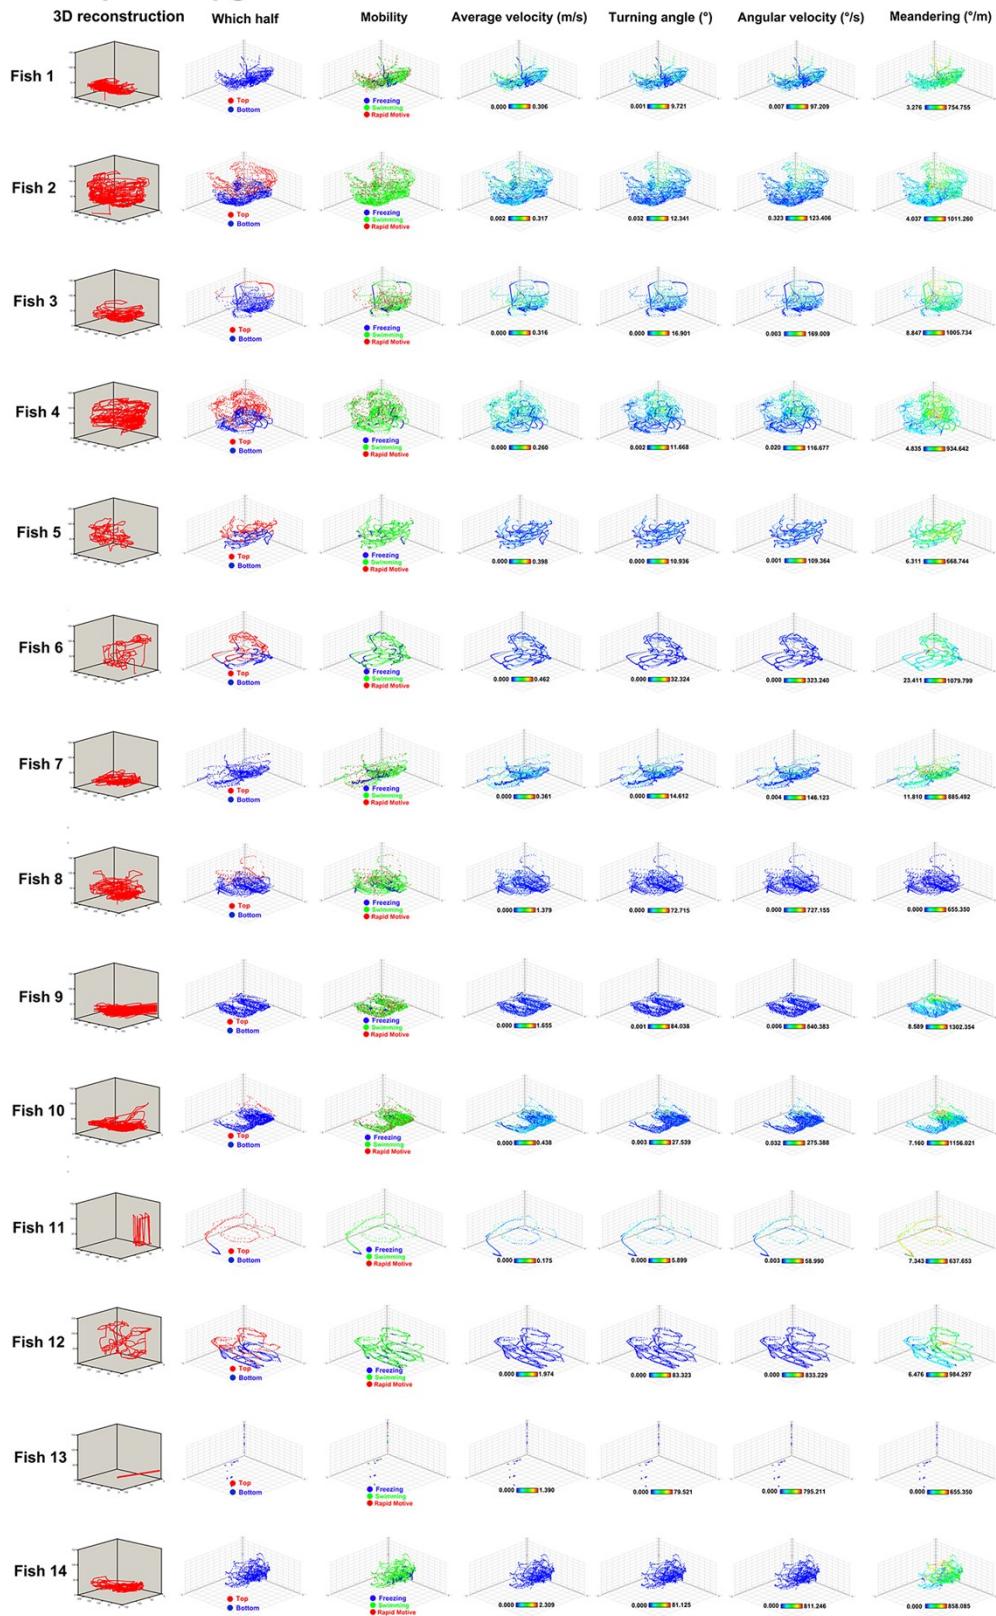

Figure S5 3D reconstruction and 3D spatiotemporal 3D reconstruction of swimming path of zebrafish exposed to 10  $\mu\text{g/mL}$  reserpine

Wild type

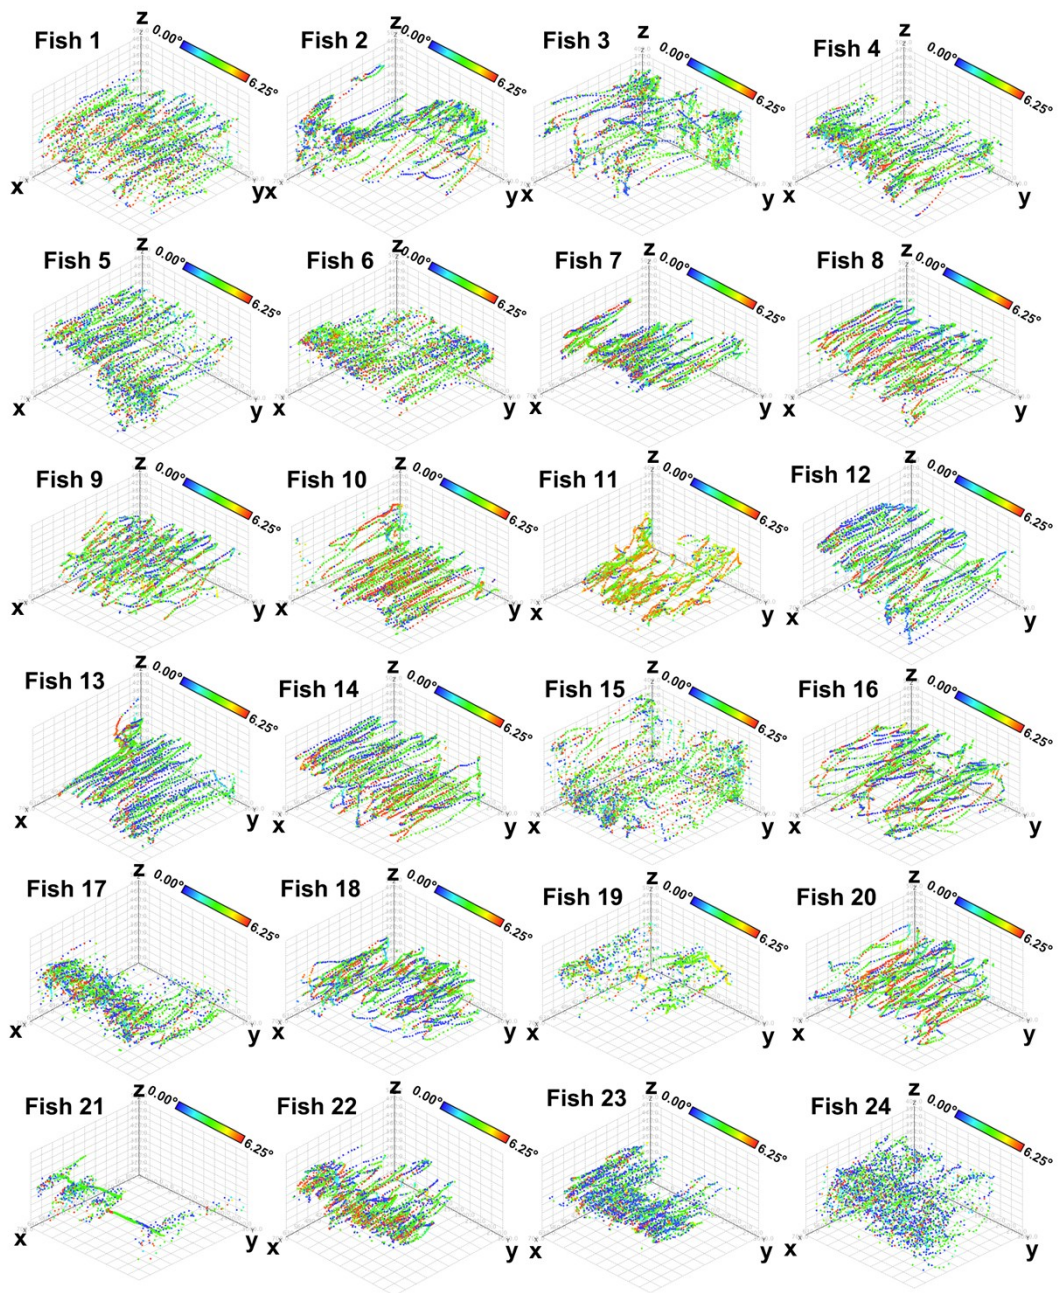

**Figure S6** 3D spatiotemporal reconstruction of instantaneous “droop tail angle” at swimming path of zebrafish exposed to 100  $\mu$ g/mL nano-silica.

Silica-100  $\mu\text{g}/\text{mL}$

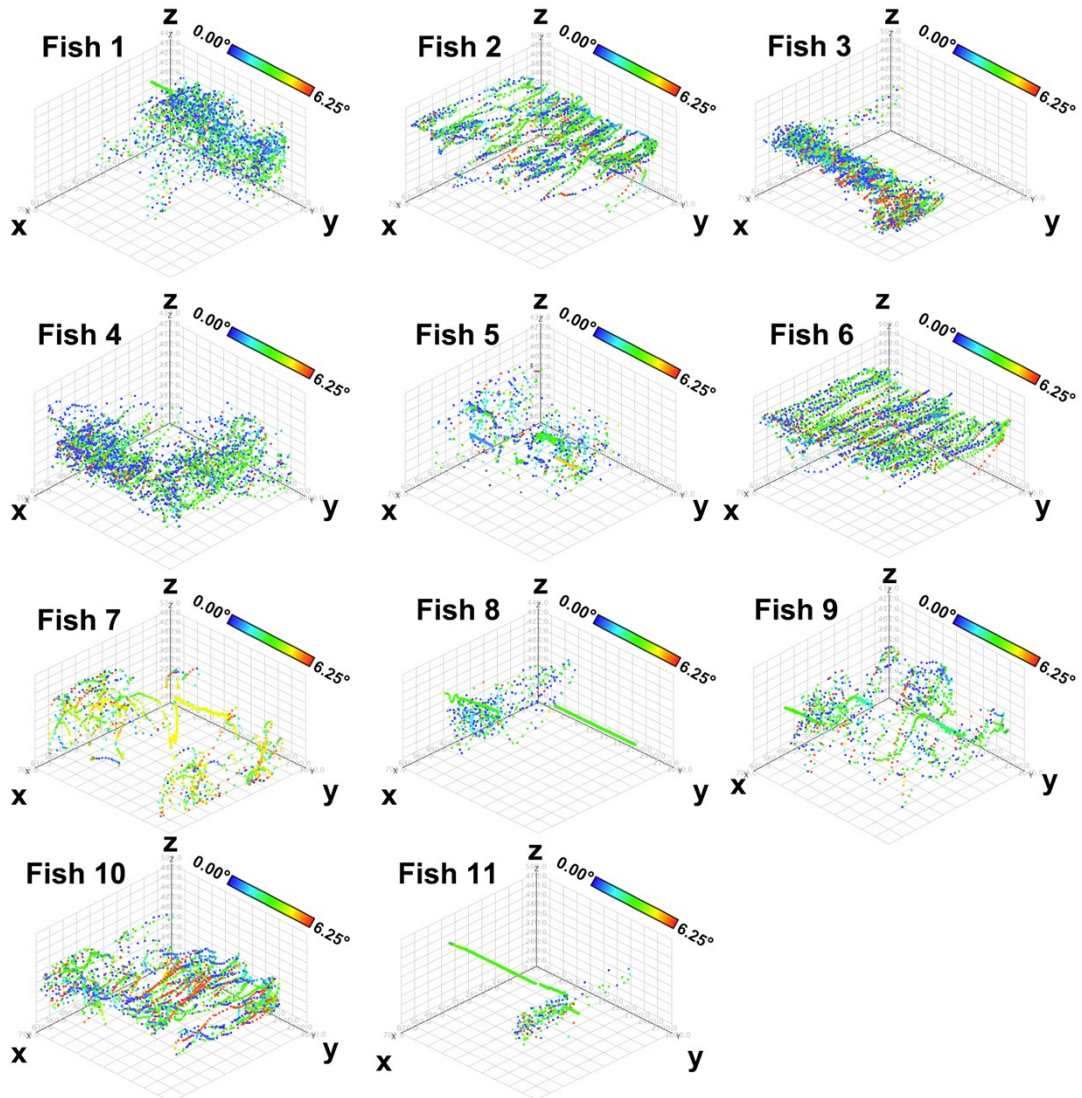

**Figure S7** 3D spatiotemporal reconstruction of instantaneous “droop tail angle” at swimming path of zebrafish exposed to 1000  $\mu\text{g}/\text{mL}$  nano-silica



Silica-1000  $\mu\text{g}/\text{mL}$

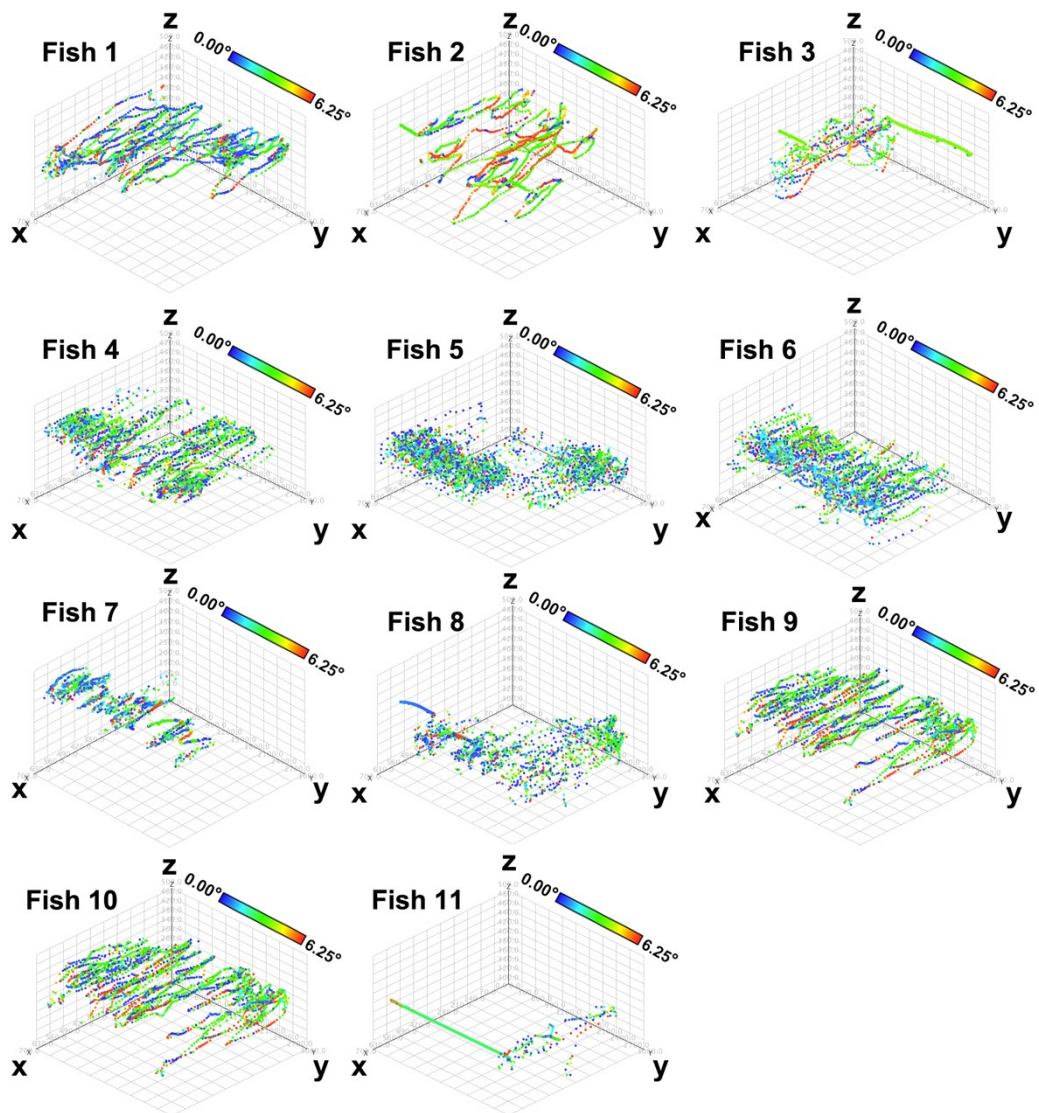

**Figure S8** 3D spatiotemporal reconstruction of instantaneous “droop tail angle” at swimming path of zebrafish exposed to 1000  $\mu\text{g}/\text{mL}$  nano-silica

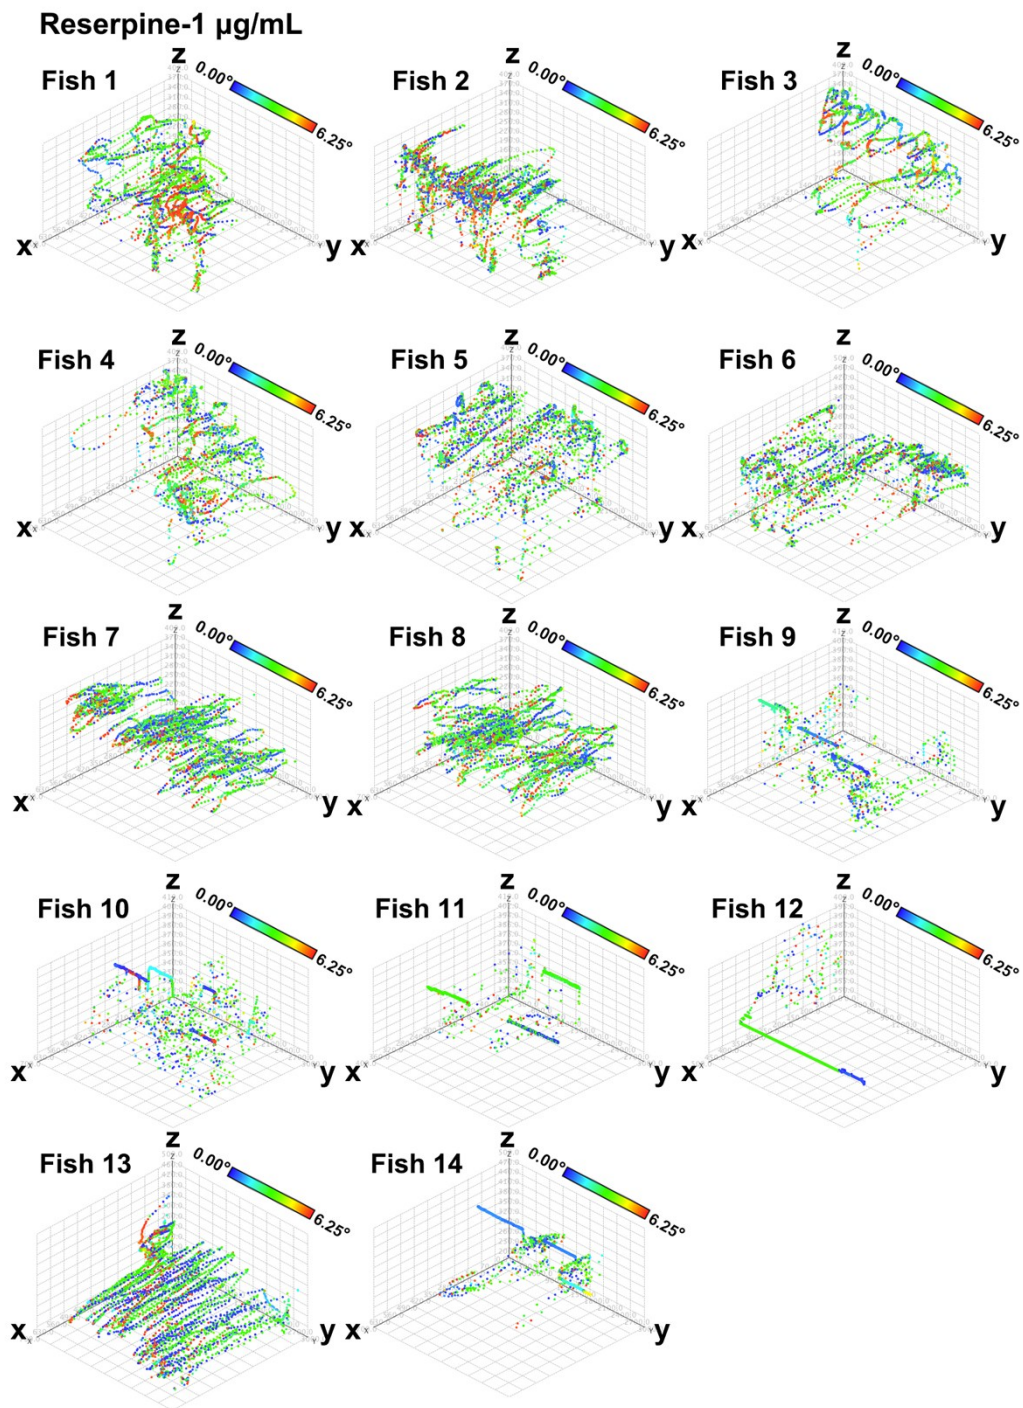

**Figure S9** 3D spatiotemporal reconstruction of instantaneous “droop tail angle” at swimming path of zebrafish exposed to 1  $\mu\text{g/mL}$  reserpine.

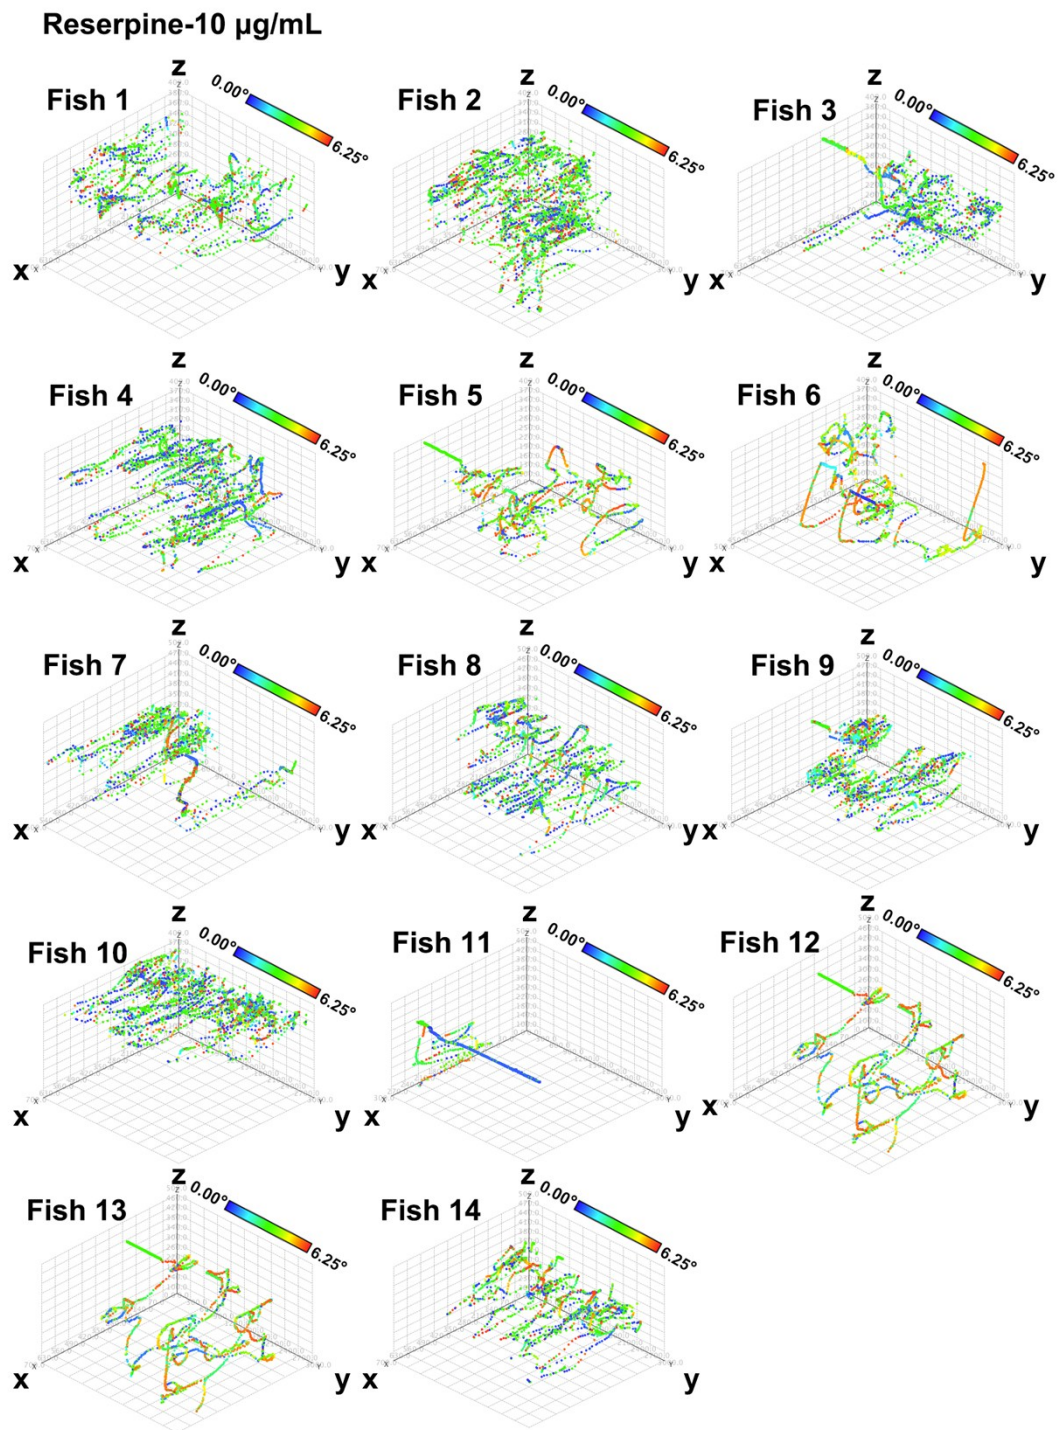

**Figure S10** 3D spatiotemporal reconstruction of instantaneous “droop tail angle” at swimming path of zebrafish exposed to 10  $\mu\text{g/mL}$  reserpine.
